# Supplementary material for: MetaGenyo: a web tool for meta-analysis of genetic association studies
Source: PubMed Central journal article supplement (PMC5732412; doi:10.1186/s12859-017-1990-4), 2017-12-16
Supplement: 12859_2017_1990_MOESM1_ESM.pdf [file 12859_2017_1990_MOESM1_ESM.pdf]

## Additional file 1

Here we provide a use case and a detailed analysis of results from the reanalysis of data reported by He et al. [1].

The input file for MetaGenyo was a text file containing the original data of the meta-analysis and reformatted to accomplish with the MetaGenyo input format [Supplementary table 1].

**Supplementary table 1.** Input table for the example meta-analysis.

| Author        | Ethnicity | Tumor type     | Source of control | GG cases | GA cases | AA cases | GG control | GA control | AA control |
|---------------|-----------|----------------|-------------------|----------|----------|----------|------------|------------|------------|
| Dong et al    | Asian     | Gastric        | PB                | 47       | 120      | 86       | 128        | 322        | 162        |
| Feng et al    | Asian     | Esophageal     | HB                | 28       | 83       | 85       | 56         | 91         | 54         |
| Gil et al     | Caucasian | Colorectal     | HB                | 26       | 58       | 16       | 50         | 67         | 16         |
| Guo et al     | Asian     | Esophageal     | PB                | 65       | 139      | 123      | 128        | 322        | 162        |
| Hall et al    | Caucasian | Esophageal     | HB                | 75       | 81       | 15       | 398        | 451        | 125        |
| Hansen et al  | Caucasian | Colorectal     | PB                | 176      | 187      | 31       | 339        | 359        | 90         |
| Huang et al a | Asian     | Esophageal     | PB                | 22       | 69       | 59       | 32         | 160        | 210        |
| Huang et al b | Asian     | Cardiac        | PB                | 20       | 60       | 65       | 13         | 55         | 112        |
| Huang et al c | Asian     | Gastric        | PB                | 12       | 57       | 77       | 13         | 55         | 112        |
| Jelonek et al | Caucasian | Colorectal     | HB                | 29       | 33       | 4        | 46         | 70         | 17         |
| Joshi et al   | Caucasian | Colorectal     | PB                | 136      | 133      | 33       | 149        | 170        | 30         |
| Liu           | Asian     | Esophageal     | PB                | 11       | 35       | 50       | 11         | 47         | 38         |
| Palli et al   | Caucasian | Gastric        | PB                | 134      | 115      | 35       | 249        | 215        | 59         |
| Pan et al     | Caucasian | Esophageal     | HB                | 179      | 166      | 35       | 151        | 219        | 88         |
| Xie           | Asian     | Hepatocellular | PB                | 139      | 203      | 73       | 144        | 219        | 116        |
| Zhang         | Asian     | Esophageal     | HB                | 33       | 82       | 91       | 44         | 96         | 66         |
| Zhen          | Asian     | Esophageal     | PB                | 99       | 145      | 107      | 53         | 188        | 159        |
| Zhu           | Asian     | Esophageal     | PB                | 50       | 69       | 69       | 52         | 88         | 63         |

**Abbreviations:** PB=population-based; HB=hospital-based.

The application guides the user across the statistical functions that should be used in the analysis, allowing non-expert users to perform a complete meta-analysis covering all the required steps.

P-values for HWE were calculated in controls and adjusted P-values greater than 0.05 indicated that the study fits with HWE conditions [Supplementary table 2]. The unadjusted P-values are the same that those calculated by the original authors [Table 1 in the original paper]. However, as the analysis comprises several studies, it is important to adjust P-values for multiple testing in order to reduce false positives, which were not calculated by the original authors. MetaGenyo corrects P-values by FDR method.

**Supplementary table 2.** P-value and adjusted P-value by FDR of  $\chi^2$  test for HWE in control samples of each study.

| Author       | HWE P-value | HWE adjusted P-value |
|--------------|-------------|----------------------|
| Dong et al   | 0.1694      | 0.4064               |
| Feng et al   | 0.1806      | 0.4064               |
| Gil et al    | 0.3686      | 0.6032               |
| Guo et al    | 0.1694      | 0.4064               |
| Hall et al   | 0.8751      | 0.8751               |
| Hansen et al | 0.7312      | 0.8751               |

|               |        |        |
|---------------|--------|--------|
| Huang et al a | 0.8434 | 0.8751 |
| Huang et al b | 0.0966 | 0.3478 |
| Huang et al c | 0.0966 | 0.3478 |
| Jelonek et al | 0.2252 | 0.4088 |
| Joshi et al   | 0.0558 | 0.3478 |
| Liu           | 0.5353 | 0.7412 |
| Palli et al   | 0.2271 | 0.4088 |
| Pan et al     | 0.5893 | 0.7577 |
| Xie           | 0.0711 | 0.3478 |
| Zhang         | 0.4116 | 0.6174 |
| Zhen          | 0.8259 | 0.8751 |
| Zhu           | 0.0631 | 0.3478 |

In the next step, statistical associations were evaluated for different genetics models. In the original work, the authors evaluated four different genetic models: dominant model (AA + AG vs. GG), recessive model (AA vs. AG + GG), heterozygote comparison (AG vs. GG) and homozygote comparison (AA vs. GG). All those comparisons can be performed with MetaGenyo, in addition to allele contrast (A vs. G), overdominant model (AG vs. AA + GG) and (AA vs. AG) comparison. A forest plot was obtained to summarize the results applying REM statistics with dominant genetic model [Supplementary figure 1], as the original authors did [Figure 2 in the original paper]. We noticed that some individual statistics are slightly different between the original forest plot and those reported by MetaGenyo. After comparing the forest plot reported in the original publication and the data that was used to generate it, we realized that some labels were exchanged in this plot (e.g. Guo et al. label actually contains the data from Gil et al. study). This mislabeling caused the discrepancies between both forest plots.

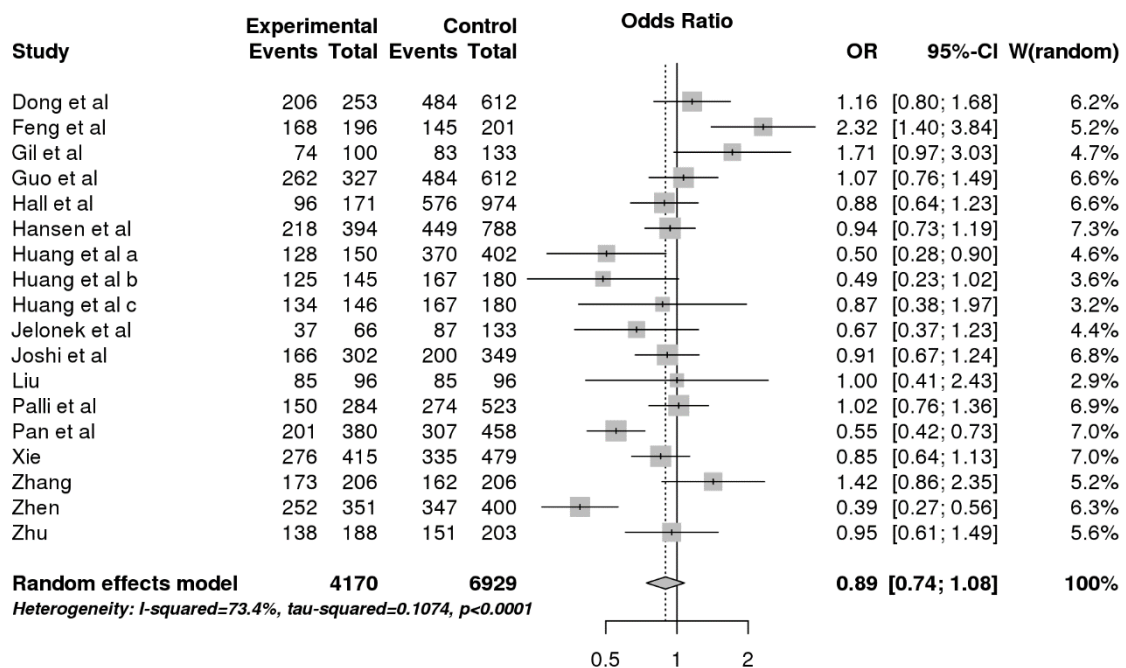

**Supplementary figure 1.** Forest plot with dominant genetic model and REM statistics generated with MetaGenyo.

For subgroup analysis, the original authors reported the results using forest plots [Figures 3 and 4 in the original paper]. MetaGenyo performs subgroup analysis generating a summary table with the selected factor [Supplementary tables 2 and 3]. All results reported with MetaGenyo with data stratified by ethnicity match the original results. However, for the meta-analysis stratified by tumor type, results differ for colorectal and gastric tumors. We realized that the original authors applied REM statistics for these groups. However, the heterogeneity indicators show that, for these subgroups, there is not significant heterogeneity ( $I^2 < 50\%$  and heterogeneity P-values  $> 0.1$ ), so FEM should be used instead of REM [2]. For subgroup analysis, MetaGenyo applies REM or FEM statistics depending on the heterogeneity P-value (REM if P-value  $< 0.1$ , FEM if otherwise). We repeated the meta-analysis for both, colorectal and gastric tumors, and we obtained the same results as the authors of the original work for the former (data not shown).

However, in gastric tumor samples in which we did not find agreement, we observed that, for some reason, original authors included samples from cardiac cancer in the gastric cancer group, causing these discrepancies with MetaGenyo results.

**Supplementary table 2.** MetaGenyo's subgroup analysis results with dominant genetic model and splitting the samples by ethnicity.

| Ethnicity | Test of association |                  |         | Test of heterogeneity |        |         |
|-----------|---------------------|------------------|---------|-----------------------|--------|---------|
|           | OR                  | 95 % CI          | P-value | Model                 | $I^2$  | P-value |
| Overall   | 0.8940              | [0.7426; 1.0762] | 0.2365  | Random                | 0.7339 | 0.0001  |
| Asian     | 0.8968              | [0.6625; 1.2139] | 0.4807  | Random                | 0.7823 | 0.0001  |
| Caucasian | 0.8809              | [0.7059; 1.0993] | 0.2619  | Random                | 0.6626 | 0.0068  |

**Supplementary table 3.** MetaGenyo's subgroup analysis results with dominant genetic model and splitting the samples by tumor type.

| Tumor type | Test of association |                  |         | Test of heterogeneity |        |         |
|------------|---------------------|------------------|---------|-----------------------|--------|---------|
|            | OR                  | 95 % CI          | P-value | Model                 | $I^2$  | P-value |
| Overall    | 0.8940              | [0.7426; 1.0762] | 0.2365  | Random                | 0.7339 | 0.0001  |
| Colorectal | 0.9549              | [0.8025; 1.1362] | 0.6029  | Fixed                 | 0.4521 | 0.1401  |
| Esophageal | 0.8668              | [0.6102; 1.2314] | 0.4249  | Random                | 0.8395 | 0.0001  |
| Gastric    | 1.0527              | [0.8449; 1.3117] | 0.6471  | Fixed                 | 0.0000 | 0.7701  |

A funnel plot was also generated, revealing that there was not publication bias in the data (see Supplementary figure 2). This MetaGenyo output is very similar to the previously published one [Figure 5 in the original paper], except the x and y axes are the opposite between both figures and MetaGenyo use the OR as the x axis, while the original plot uses the  $\log(OR)$ .

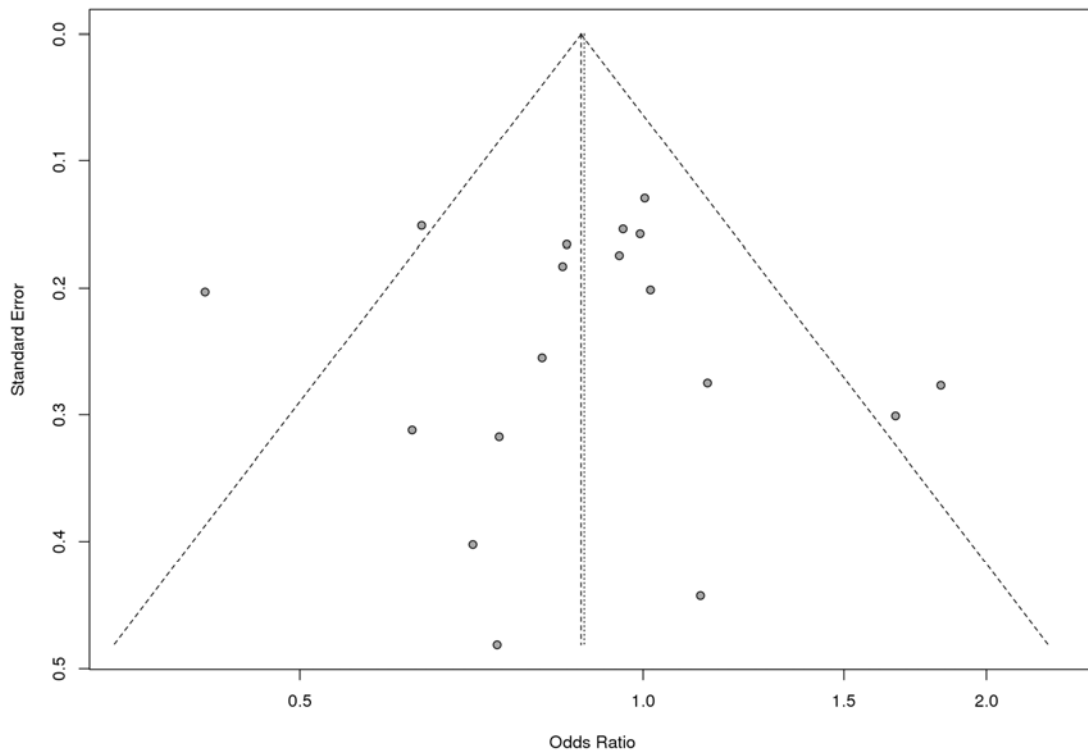

**Supplementary figure 2.** Funnel plot of AG vs. GG comparison generated by MetaGenyo.

Finally, a sensitivity analysis was performed with MetaGenyo generating a forest plot of the results excluding one of the studies in each step [Supplementary figure 3] revealing that the results were not biased by any single study from those originally included in the work. The original authors performed the same sensitivity analysis and reached the same conclusions, but they did not include a forest plot of such analysis.

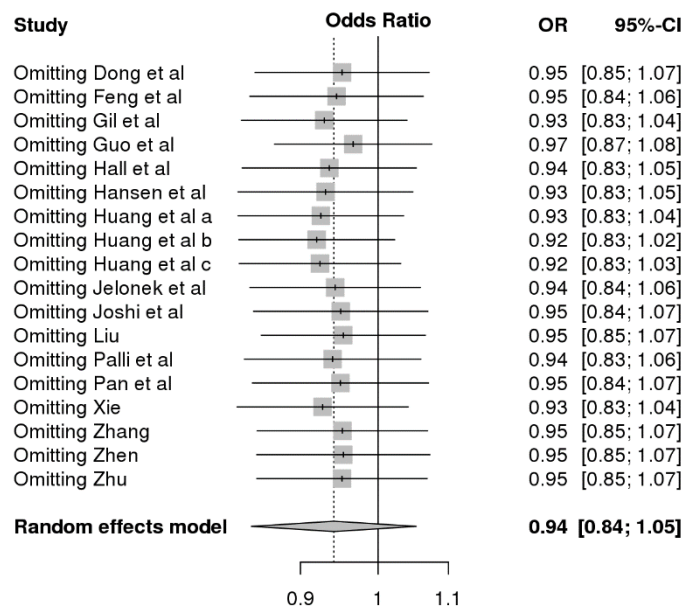

**Supplementary figure 3.** Forest plot of sensitivity analysis under overdominant model and REM statistics.

## References

1. He L, Deng T, Luo H. XPA A23G polymorphism and risk of digestive system cancers: a meta-analysis. *Onco Targets Ther.* 2015;8:385–94.
2. Ried K. Interpreting and understanding meta-analysis graphs--a practical guide. *Aust Fam Physician.* 2006;35(8):635–8.
